# Supplementary material
Source: PubMed Central journal article supplement (PMC6869148)
Supplement: HBM-35-5236-s002.pdf [file HBM-35-5236-s002.pdf]

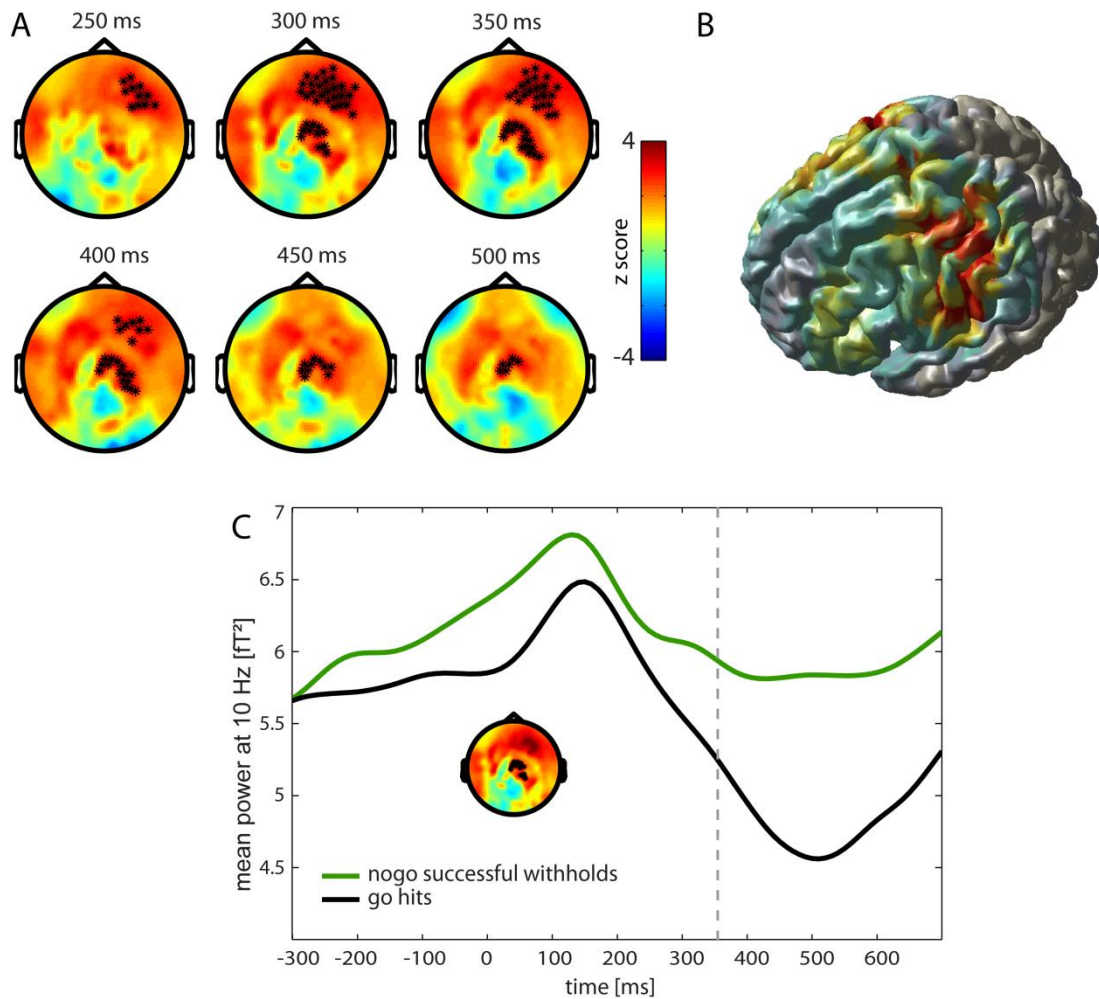

**Figure S2** Activity within the alpha frequency band (8-12 Hz). **A** Go-nogo difference of time-frequency representation (TFR) in the alpha frequency band. Red indicates higher power for successful withholds and blue higher power for hits. Significant channels are displayed by stars ( $p < 0.01$ ). **B** Source reconstruction of the difference in alpha band with DICS beamformer in the period of 200-600 ms, projected onto a surface. Areas with higher power for successful withholds than for hits are shown. The strongest power difference was observed in left precentral gyrus (MNI coordinate: -40 -20 60). **C** Mean power at 10 Hz of TFR in channels of central cluster is shown. Black: go trials with correct response (hits), Green: nogo trials with successful withholding of the response. Dashed line: mean reaction time of hits.
